# Supplementary material
Source: ML conference proceedings conference paper supplement (https://openaccess.thecvf.com/content/ICCV2023/html/Li_UniFormerV2_Unlocking_the_ICCV_2023_paper.html)
Supplement: Supplementary file 3 [file Li_UniFormerV2_Unlocking_the_ICCV_2023_supplemental.zip]

Archive with 4 entries (4 files):
- 05119-code.zip
- __MACOSX/._05119-code.zip
- 05119-supp.pdf
- __MACOSX/._05119-supp.pdf
